# Supplementary material for: Removal of cytotoxic tamoxifen from aqueous solutions using a geopolymer-based nepheline–cordierite adsorbent
Source: publisher site journal article supplement (doi:10.1515/chem-2025-0213), 2025-01-01
Supplement: Supplementary file 1 [file j_chem-2025-0213_suppl_001.docx]

**SUPPLEMENTARY FILES**

**Figure 1.** SEM photo of adsorbent material (Mag: 5.00 KX)

**Figure 2.** SEM photo of adsorbent material (Mag: 1.00 KX)

**Figure 3.** SEM photo of adsorbent material (Mag: 250 X)

**Figure 4.** Isotherm linear plot of adsorbent material

**Figure 5.** BET surface area plot of adsorbent material

**Figure 6.** t plot of adsorbent material

**
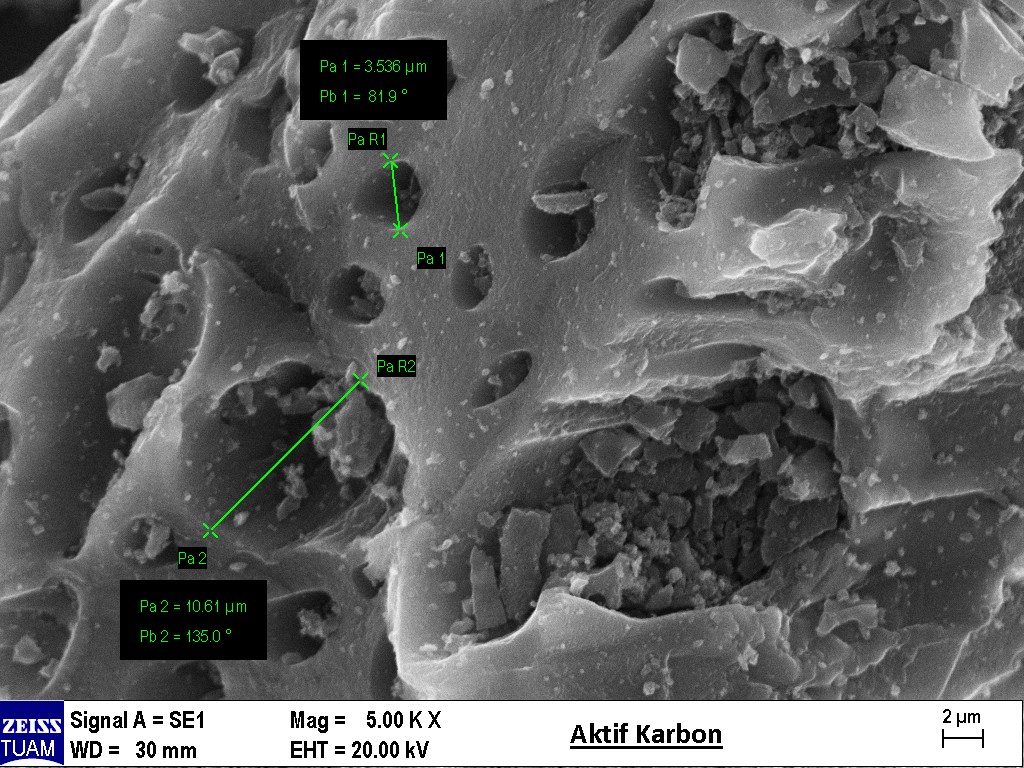
**

**Figure 1.** SEM Photo of adsorbent material (Mag: 5.00 KX)

**
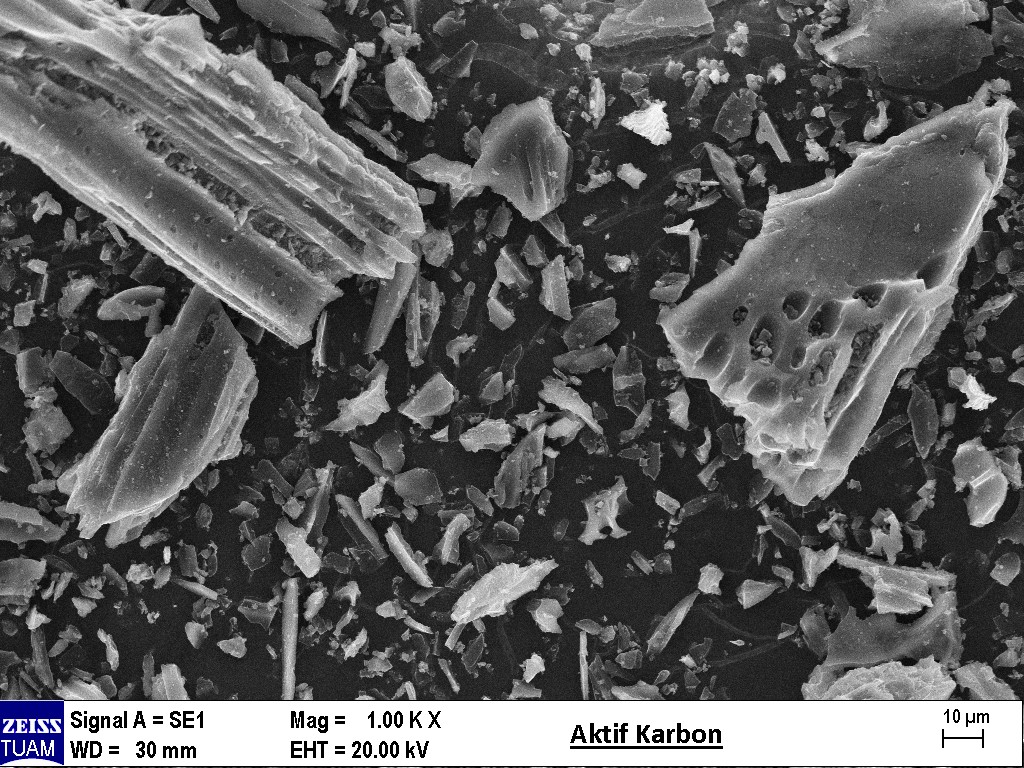
**

**Figure 2.** SEM photo of adsorbent material (Mag: 1.00 KX)

**
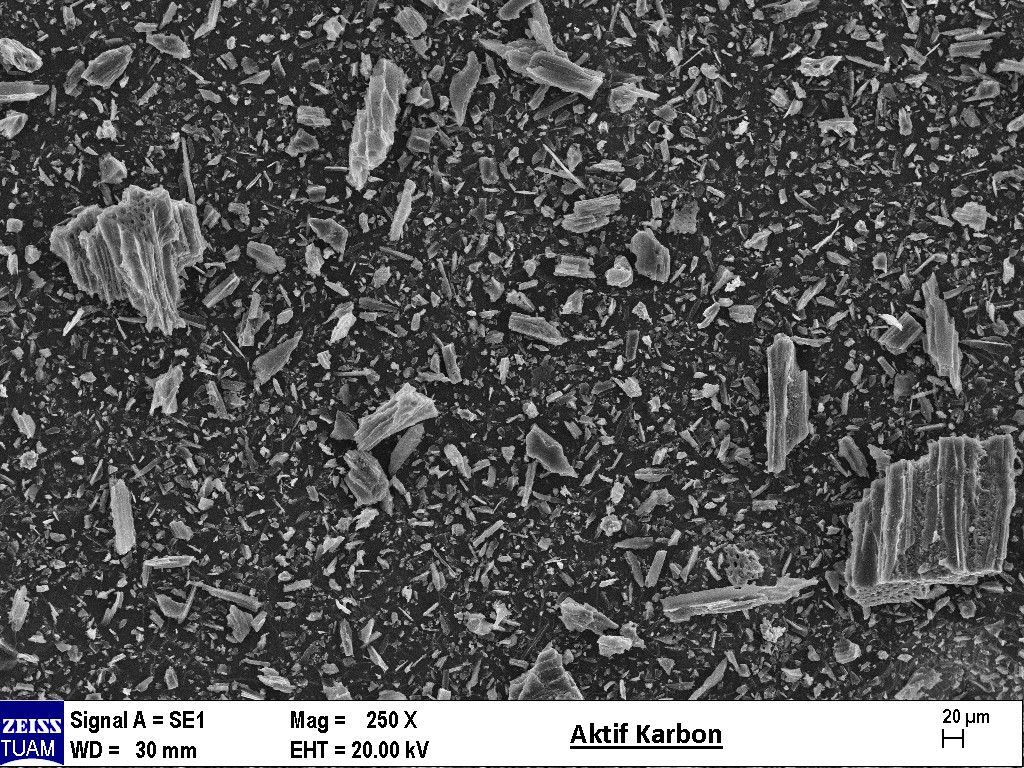
**

**Figure 3.** SEM photo of adsorbent material (Mag: 250 X)


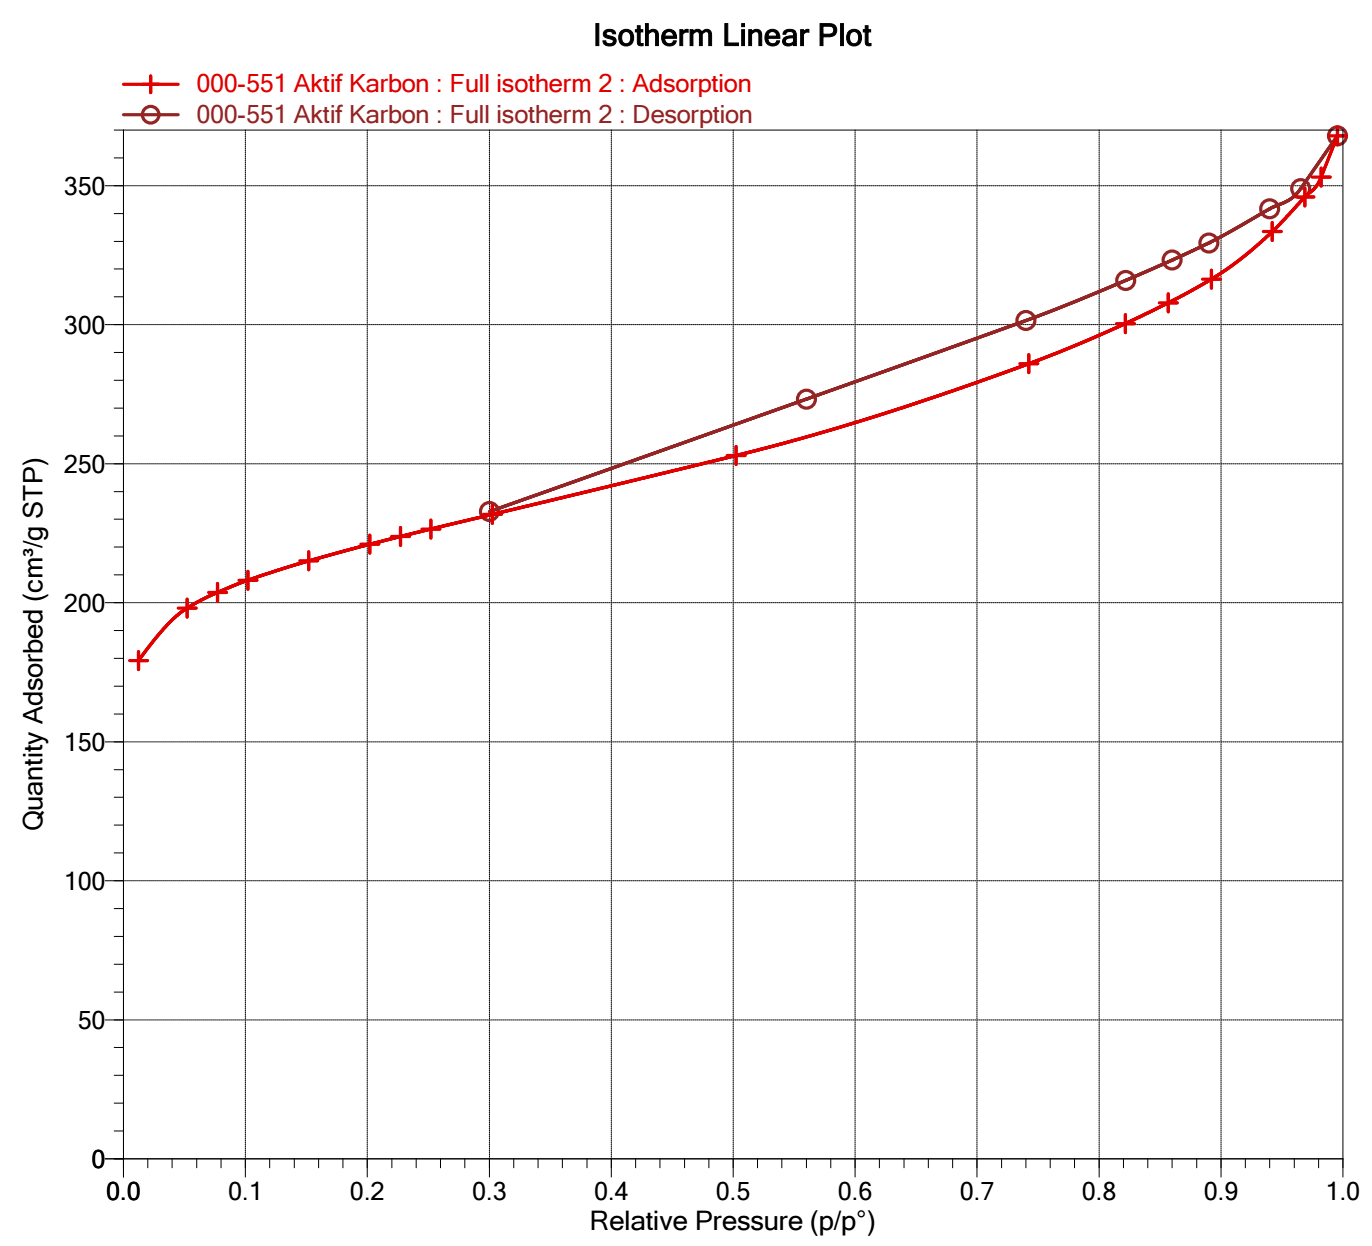


**Figure 4.** Isotherm linear plot of adsorbent material


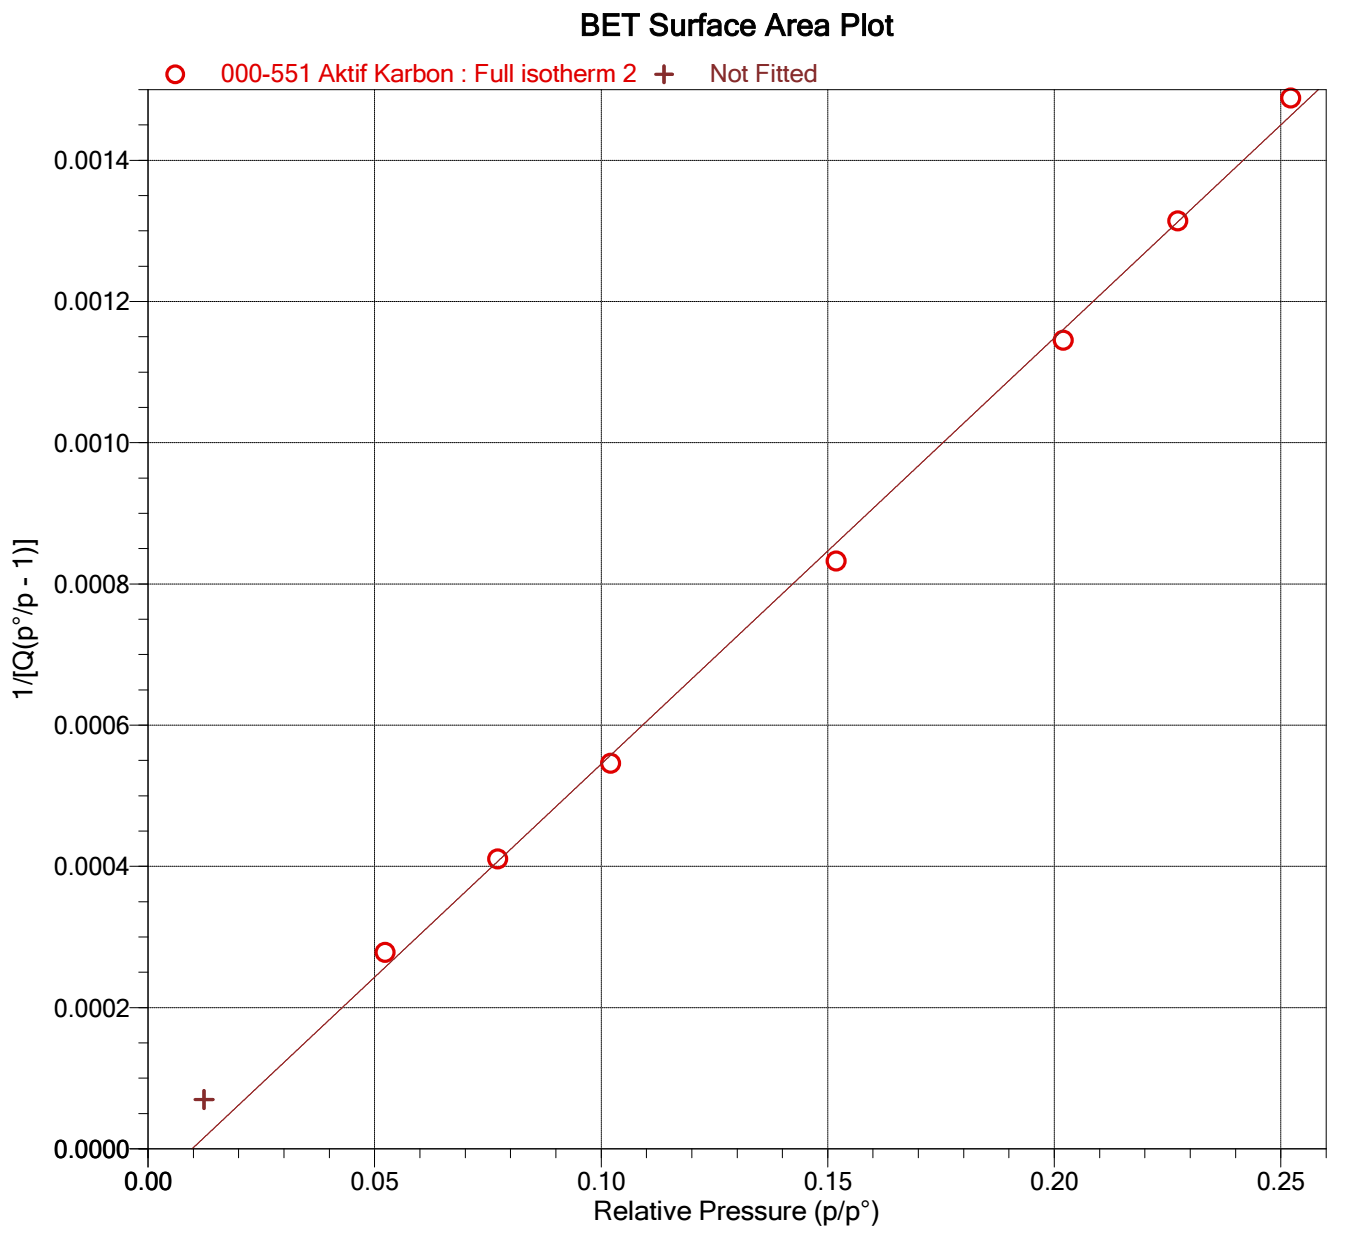


**Figure 5.** BET surface area plot of adsorbent material


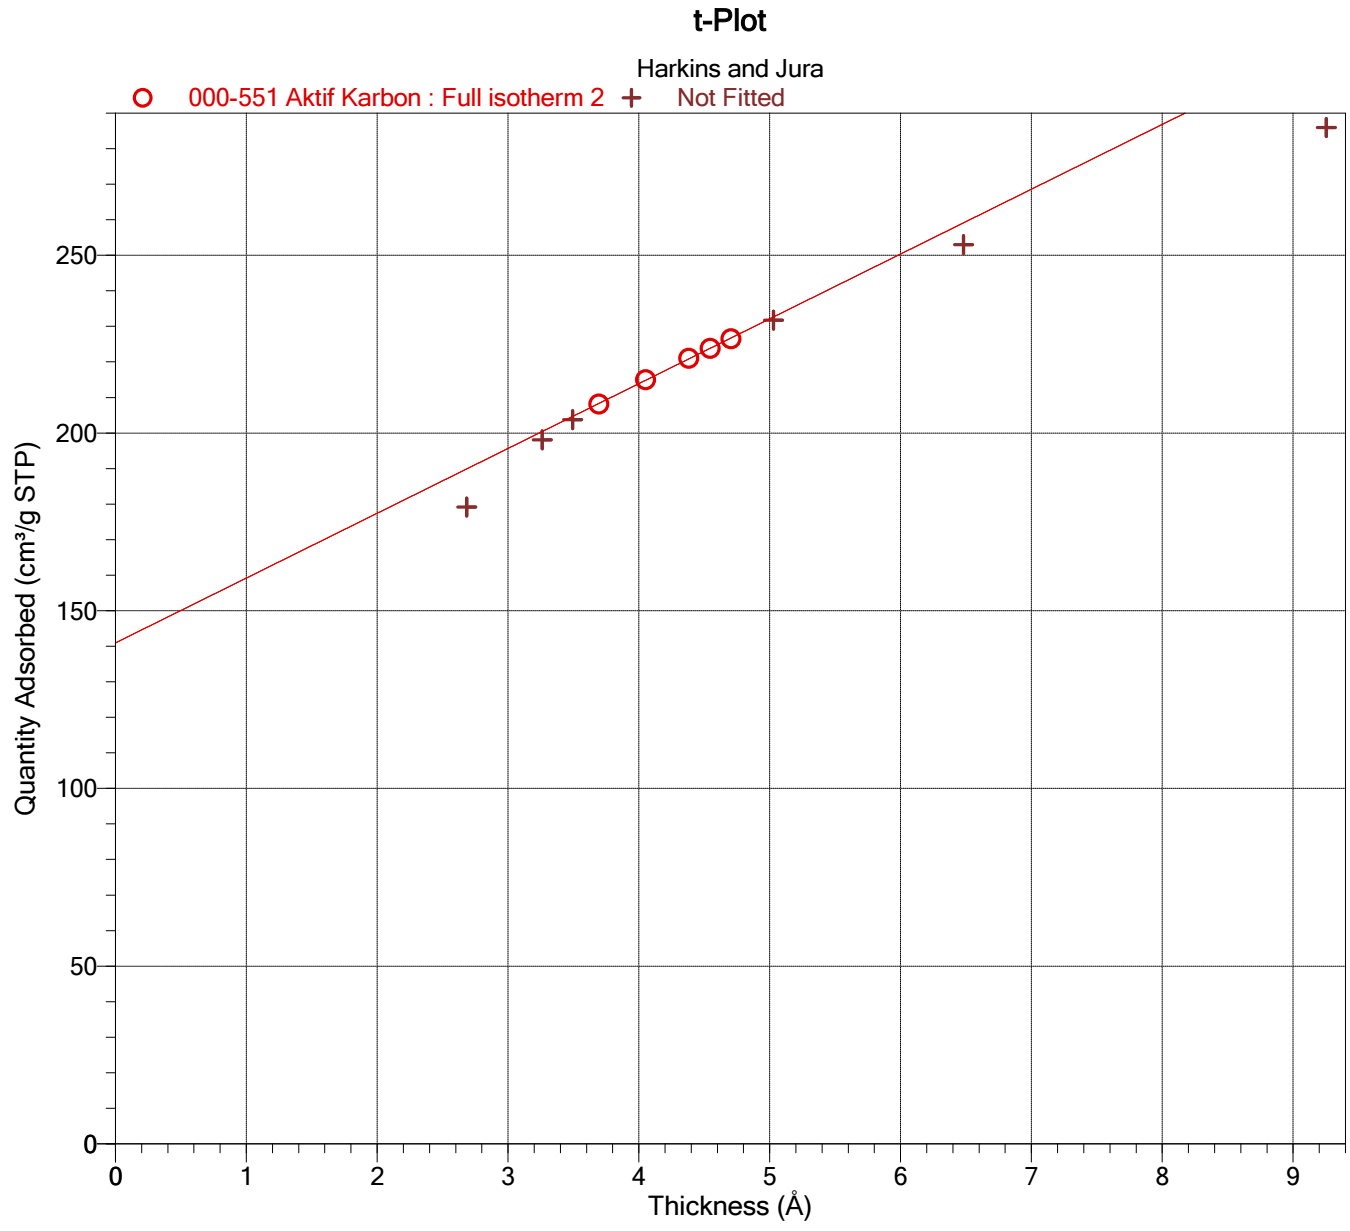


**Figure 6.** t plot of adsorbent material
